Table S1. Natural and standardized twinning rates, number of twin births, total births, survey years, and annual change for 76 low and middle income countries

| Country              | Continent    | Natural Twinning rate <sup>a</sup> | Standardized Twinning rate <sup>b</sup> | Twin Births <sup>c</sup> | Total Births <sup>d</sup> | First Year <sup>e</sup> | Last Year <sup>f</sup> | Annual Change <sup>g</sup> |
|----------------------|--------------|------------------------------------|-----------------------------------------|--------------------------|---------------------------|-------------------------|------------------------|----------------------------|
| Albania              | Europe       | 12.0                               | 11.6                                    | 49                       | 4079                      | 2009                    | -                      | -                          |
| Armenia              | Asia         | 9.0                                | 10.1                                    | 69                       | 7641                      | 2000                    | 2005                   | 0.11                       |
| Azerbaijan           | Asia         | 7.1                                | 7.9                                     | 36                       | 5046                      | 2006                    | -                      | -                          |
| Bangladesh           | Asia         | 8.5                                | 9.8                                     | 359                      | 42142                     | 1996                    | 2007                   | -0.03                      |
| Benin                | Africa       | 27.9                               | 27.7                                    | 1495                     | 53595                     | 1996                    | 2006                   | -0.23                      |
| Bolivia              | Lat. America | 6.7                                | 6.5                                     | 383                      | 57081                     | 1998                    | 2008                   | -0.01                      |
| Brazil               | Lat. America | 8.8                                | 9.3                                     | 98                       | 11099                     | 1996                    | -                      | -                          |
| Burkina Faso         | Africa       | 16.1                               | 15.9                                    | 750                      | 46453                     | 1993                    | 2003                   | 0.25                       |
| Cambodia             | Asia         | 9.4                                | 8.6                                     | 379                      | 40239                     | 2000                    | 2005                   | -0.20                      |
| Cameroon             | Africa       | 21.9                               | 22.9                                    | 515                      | 23522                     | 1998                    | 2004                   | 0.50                       |
| Central African Rep. | Africa       | 13.8                               | 14.3                                    | 116                      | 8418                      | 1996                    | -                      | -                          |
| Chad                 | Africa       | 15.6                               | 16.1                                    | 409                      | 26246                     | 1997                    | 2004                   | -0.23                      |
| Colombia             | Lat. America | 8.2                                | 8.4                                     | 409                      | 49876                     | 1995                    | 2005                   | -0.04                      |
| Comoros              | Africa       | 19.9                               | 18.9                                    | 83                       | 4164                      | 1996                    | -                      | -                          |
| Congo Brazzaville    | Africa       | 21.3                               | 21.9                                    | 195                      | 9134                      | 2005                    | -                      | -                          |
| Congo Dem. Rep.      | Africa       | 18.2                               | 17.9                                    | 308                      | 16933                     | 2007                    | -                      | -                          |
| Cote d'Ivoire        | Africa       | 15.9                               | 16.3                                    | 292                      | 18384                     | 1994                    | 1999                   | 0.35                       |
| Dominican Rep.       | Lat. America | 11.2                               | 12.0                                    | 650                      | 57906                     | 1996                    | 2007                   | -0.07                      |
| Ecuador              | Lat. America | 9.6                                | 9.8                                     | 59                       | 6167                      | 1987                    | -                      | -                          |
| Egypt                | Africa       | 17.7                               | 17.5                                    | 2007                     | 113323                    | 1995                    | 2008                   | 0.16                       |
| Ethiopia             | Africa       | 11.0                               | 10.9                                    | 474                      | 43092                     | 2000                    | 2005                   | -0.33                      |
| Gabon                | Africa       | 19.4                               | 20.0                                    | 173                      | 8936                      | 2000                    | -                      | -                          |
| Ghana                | Africa       | 20.4                               | 19.0                                    | 431                      | 21078                     | 1998                    | 2008                   | 0.40                       |
| Guatemala            | Lat. America | 7.3                                | 7.2                                     | 217                      | 29911                     | 1995                    | 1999                   | -0.48                      |
| Guinea               | Africa       | 21.3                               | 21.1                                    | 572                      | 26846                     | 1999                    | 2005                   | 1.05                       |
| Haiti                | Lat. America | 14.1                               | 13.3                                    | 477                      | 33861                     | 1994                    | 2005                   | -0.31                      |
| Honduras             | Lat. America | 8.1                                | 8.5                                     | 206                      | 25530                     | 2005                    | -                      | -                          |
| India                | Asia         | 7.2                                | 7.7                                     | 2685                     | 373093                    | 1992                    | 2006                   | 0.06                       |
| Indonesia            | Asia         | 7.2                                | 7.1                                     | 799                      | 110601                    | 1997                    | 2007                   | 0.08                       |
| Jordan               | Asia         | 14.4                               | 13.1                                    | 491                      | 34203                     | 2002                    | 2007                   | 0.09                       |
| Kazakhstan           | Asia         | 9.8                                | 9.7                                     | 66                       | 6740                      | 1995                    | 1999                   | 0.39                       |
| Kenya                | Africa       | 15.6                               | 16.1                                    | 747                      | 47804                     | 1993                    | 2008                   | -0.04                      |
| Kyrgyzstan           | Asia         | 8.7                                | 8.9                                     | 38                       | 4348                      | 1997                    | -                      | -                          |
| Lesotho              | Africa       | 14.5                               | 14.6                                    | 209                      | 14414                     | 2004                    | 2010                   | -0.29                      |
| Liberia              | Africa       | 20.1                               | 20.6                                    | 222                      | 11026                     | 2007                    | -                      | -                          |
| Madagascar           | Africa       | 10.6                               | 10.7                                    | 620                      | 58512                     | 1992                    | 2009                   | -0.05                      |
| Malawi               | Africa       | 20.8                               | 21.6                                    | 1102                     | 53030                     | 1992                    | 2004                   | -0.36                      |
| Maldives             | Asia         | 8.0                                | 8.2                                     | 59                       | 7352                      | 2009                    | -                      | -                          |
| Mali                 | Africa       | 16.9                               | 17.3                                    | 1309                     | 77406                     | 1995                    | 2006                   | 0.12                       |
| Mauritania           | Africa       | 17.2                               | 16.7                                    | 162                      | 9435                      | 2001                    | -                      | -                          |
| Mexico               | Lat. America | 10.5                               | 10.7                                    | 112                      | 10700                     | 1987                    | -                      | -                          |
| Moldova              | Europe       | 8.2                                | 8.9                                     | 27                       | 3294                      | 2005                    | -                      | -                          |
| Morocco              | Africa       | 12.1                               | 11.1                                    | 297                      | 24598                     | 1992                    | 2003                   | 0.29                       |
| Mozambique           | Africa       | 18.6                               | 19.2                                    | 645                      | 34702                     | 1997                    | 2003                   | 0.23                       |
| Namibia              | Africa       | 13.3                               | 13.0                                    | 253                      | 18977                     | 2000                    | 2006                   | 0.08                       |

Table continued on next page

Table S1 continued

| Country             | Continent    | Natural<br>Twinning rate <sup>a</sup> | Standardized<br>Twinning rate <sup>b</sup> | Twin<br>Births <sup>c</sup> | Total<br>Births <sup>d</sup> | First<br>Year <sup>e</sup> | Last<br>Year <sup>f</sup> | Annual<br>Change <sup>g</sup> |
|---------------------|--------------|---------------------------------------|--------------------------------------------|-----------------------------|------------------------------|----------------------------|---------------------------|-------------------------------|
| Nepal               | Asia         | 6.9                                   | 7.2                                        | 287                         | 41471                        | 1996                       | 2006                      | 0.07                          |
| Nicaragua           | Lat. America | 8.1                                   | 8.4                                        | 268                         | 33228                        | 1998                       | 2001                      | 0.27                          |
| Niger               | Africa       | 17.3                                  | 17.8                                       | 595                         | 34433                        | 1998                       | 2006                      | 0.06                          |
| Nigeria             | Africa       | 19.0                                  | 19.0                                       | 1581                        | 83003                        | 1999                       | 2008                      | -0.30                         |
| Pakistan            | Asia         | 9.6                                   | 9.5                                        | 323                         | 33483                        | 1991                       | 2007                      | 0.10                          |
| Paraguay            | Lat. America | 9.9                                   | 9.7                                        | 85                          | 8611                         | 1990                       | -                         | -                             |
| Peru                | Lat. America | 7.6                                   | 7.4                                        | 804                         | 105340                       | 1996                       | 2008                      | 0.01                          |
| Philippines         | Asia         | 7.2                                   | 6.8                                        | 329                         | 45516                        | 1998                       | 2008                      | 0.03                          |
| Rwanda              | Africa       | 12.3                                  | 11.1                                       | 542                         | 44135                        | 1992                       | 2005                      | 0.32                          |
| Sao Tome & Principe | Africa       | 19.3                                  | 18.9                                       | 69                          | 3579                         | 2009                       | -                         | -                             |
| Senegal             | Africa       | 15.1                                  | 15.0                                       | 500                         | 33166                        | 1992                       | 2005                      | 0.35                          |
| Sierra Leone        | Africa       | 17.7                                  | 17.9                                       | 213                         | 12030                        | 2008                       | -                         | -                             |
| South Africa        | Africa       | 12.6                                  | 12.5                                       | 133                         | 10552                        | 1998                       | -                         | -                             |
| Sri Lanka           | Asia         | 9.4                                   | 9.0                                        | 79                          | 8422                         | 1987                       | -                         | -                             |
| Sudan               | Africa       | 14.9                                  | 14.8                                       | 196                         | 13187                        | 1990                       | -                         | -                             |
| Swaziland           | Africa       | 14.3                                  | 14.9                                       | 81                          | 5673                         | 2006                       | -                         | -                             |
| Tanzania            | Africa       | 18.8                                  | 18.9                                       | 717                         | 38232                        | 1992                       | 2004                      | 0.32                          |
| Thailand            | Asia         | 6.8                                   | 6.8                                        | 53                          | 7825                         | 1987                       | -                         | -                             |
| Timor Leste         | Asia         | 8.9                                   | 8.5                                        | 188                         | 21119                        | 2009                       | -                         | -                             |
| Togo                | Africa       | 21.4                                  | 21.3                                       | 301                         | 14074                        | 1998                       | -                         | -                             |
| Trinidad & Tobago   | Lat. America | 7.2                                   | 7.4                                        | 28                          | 3883                         | 1987                       | -                         | -                             |
| Tunisia             | Africa       | 14.3                                  | 13.3                                       | 131                         | 9146                         | 1988                       | -                         | -                             |
| Turkey              | Asia         | 9.9                                   | 9.8                                        | 264                         | 26600                        | 1993                       | 2003                      | 0.01                          |
| Uganda              | Africa       | 14.6                                  | 15.4                                       | 630                         | 43078                        | 1995                       | 2006                      | 0.10                          |
| Ukraine             | Europe       | 8.9                                   | 8.2                                        | 24                          | 2711                         | 2007                       | -                         | -                             |
| Uzbekistan          | Asia         | 9.8                                   | 9.9                                        | 49                          | 4985                         | 1996                       | -                         | -                             |
| Vietnam             | Asia         | 6.2                                   | 6.5                                        | 83                          | 13354                        | 1997                       | 2002                      | -0.39                         |
| Yemen               | Asia         | 9.8                                   | 9.0                                        | 169                         | 17223                        | 1991                       | -                         | -                             |
| Zambia              | Africa       | 18.6                                  | 19.2                                       | 718                         | 38675                        | 1996                       | 2007                      | -0.11                         |
| Zimbabwe            | Africa       | 15.7                                  | 16.0                                       | 401                         | 25538                        | 1994                       | 2006                      | -0.19                         |
| Total without China | 75 countries | 13.2 <sup>h</sup>                     | 13.2 <sup>h</sup>                          | 30,895                      | 2,473,209                    | 1987                       | 2010                      | -                             |
| China               | Asia         | 7.9                                   | 8.7                                        | 186,273                     | 23,477,961                   | 1989                       | -                         | -                             |
| Total with China    | 76 countries | 13.1 <sup>i</sup>                     | 13.1 <sup>i</sup>                          | 217,168                     | 25,951,170                   | 1987                       | 2010                      | -                             |

## Notes

a Natural twinning rate=1000\*twin births/total births.

b Standardized for age at birth of the mother.

c Number of twin births in ten years before survey.

d Total number of live births in ten years before survey .

e Year of first survey.

f Year of last survey (only available for countries with at least two surveys).

g Average annual change in twinning rate between first and last survey.

h Average twinning rate 75 countries, each country weighted equally

i Average twinning rate 76 countries, each country weighted equally
