# Supplementary material for: Twinning across the Developing World
Source: PLOS journal article supplement (doi:10.1371/journal.pone.0025239), 2011-09-28
Supplement: S2 (10.1371/journal.pone.0025239.s002) [file journal.pone.0025239.s002]

## S1 Twinning rates in Asian countries over time

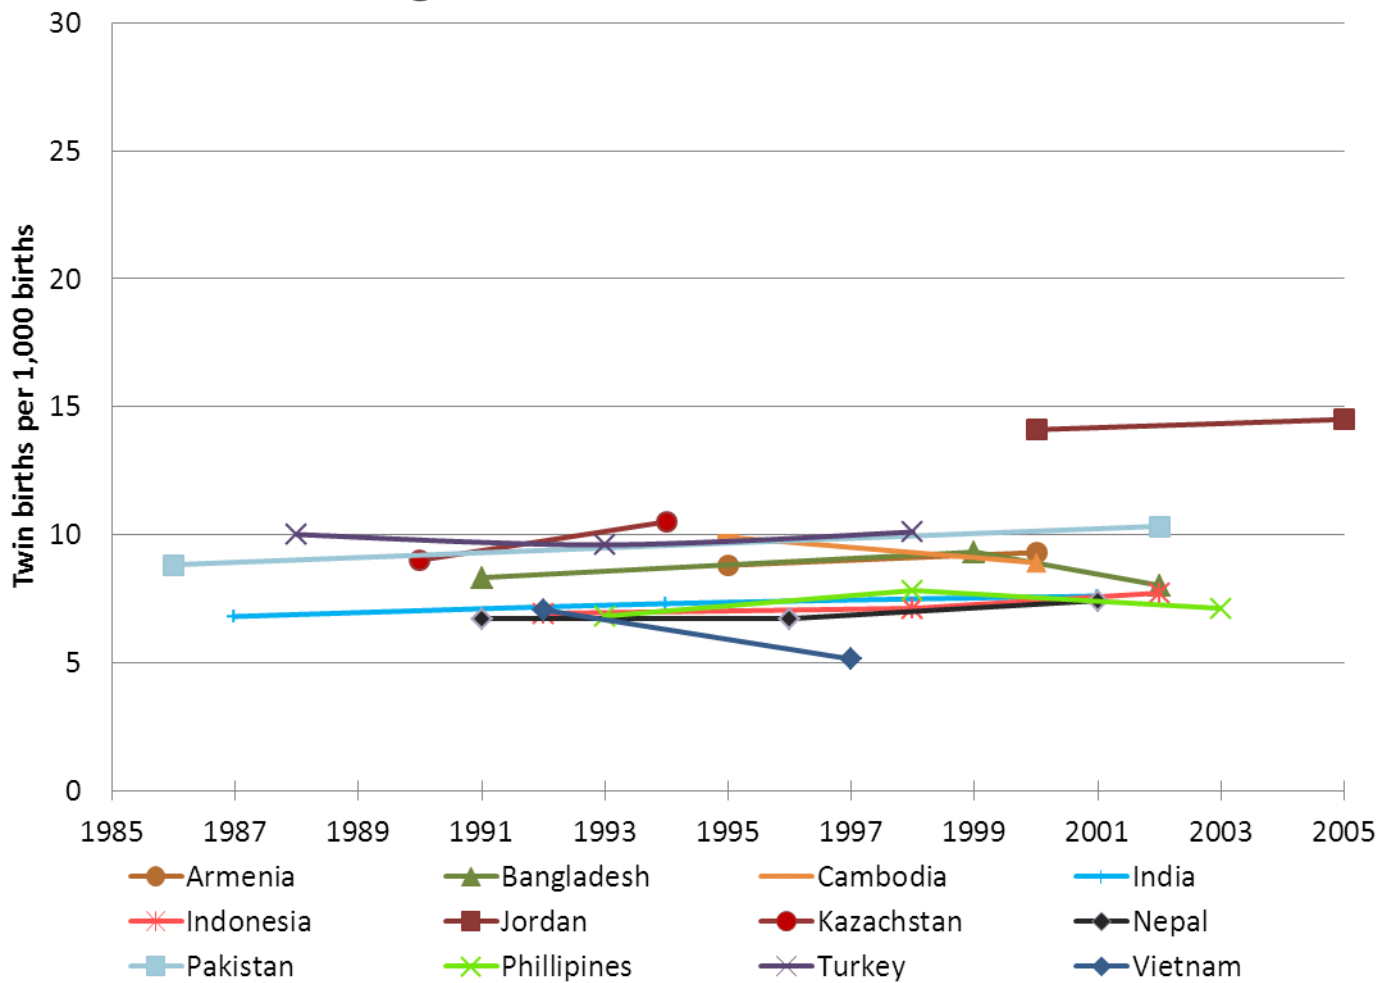

Note. Years on the x-axis refer to the mid-point of the ten year period in which births are observed (for example, 1996 refers to the 1991-2001 period).
