# Supplementary material for: Twinning across the Developing World
Source: PLOS journal article supplement (doi:10.1371/journal.pone.0025239), 2011-09-28
Supplement: S3 (10.1371/journal.pone.0025239.s003) [file journal.pone.0025239.s003]

## S2 Twinning rates in Latin American countries over time

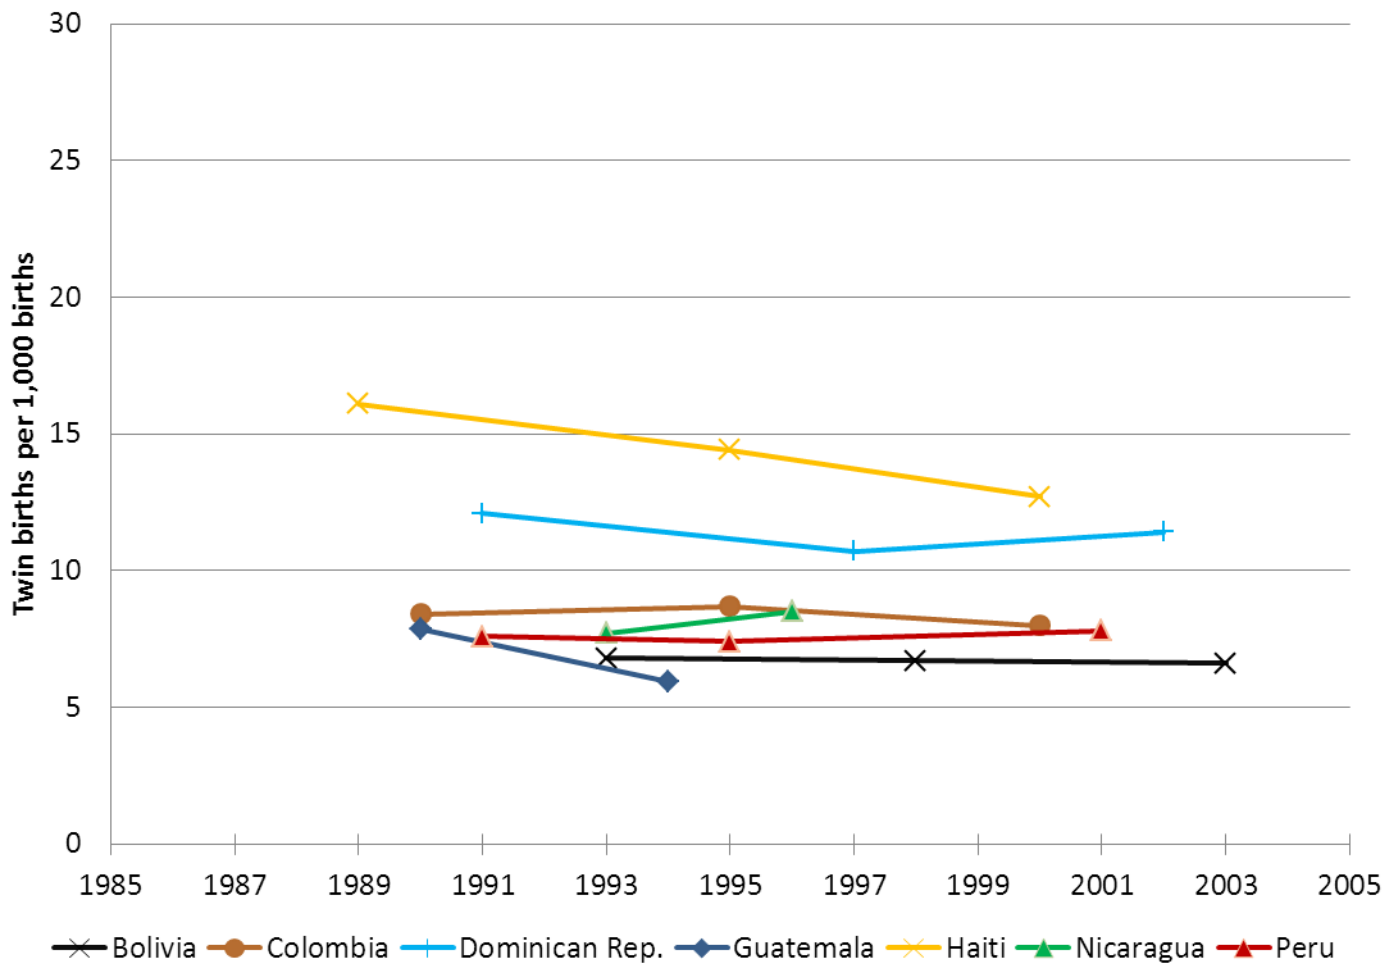

Note. Years on the x-axis refer to the mid-point of the ten year period in which births are observed (for example, 1996 refers to the 1991-2001 period).
